# Supplementary material
Source: HighWire-hosted journal article supplement (https://sti.bmj.com/content/sextrans-2017-053325)
Supplement: inline-supplementary-material-2 [file inline-supplementary-material-2.pdf]

## Supplementary Material

Gilbert M, Thomson K, Salway T et al. Differences in experiences of barriers to testing between clients of the online STI testing service GetCheckedOnline.com and STI clinics in Vancouver, Canada.

**Table: Comparison of hypothesized testing barriers and facilitators between *GetCheckedOnline* (n=73) and clinic clients (n=321).**

### a. Individual level

| Factor                                                                                                      | GCO clients<br>n (%) | Clinic clients<br>n (%) | p -<br>value <sup>a</sup> |
|-------------------------------------------------------------------------------------------------------------|----------------------|-------------------------|---------------------------|
| Online health information seeking<br>(few times a month or less)                                            | 38/71 (54)           | 141/287 (49)            | 0.507                     |
| eHealth literacy score <sup>b</sup> out of 8 (mean, range)<br>(lower score = higher literacy)               | 2.07 (1.0-3.9)       | 2.14 (1.0, 4.5)         | 0.481                     |
| Usefulness of internet for making health decisions<br>(Very useful vs other)                                | 27/58 (47)           | 89/233 (38)             | 0.245                     |
| Importance of being able to access online health resources<br>(Very important vs other)                     | 48/58 (83)           | 136/231 (59)            | <b>0.001</b>              |
| Self-assessed internet skills<br>(expert vs other)                                                          | 25/70 (36)           | 76/290 (26)             | 0.112                     |
| Positive attitude to technology                                                                             |                      |                         |                           |
| I am excited about the possibilities represented by new technologies (totally agree)                        | 41/58 (71)           | 123/232 (53)            | 0.015                     |
| I always keep informed about the latest technological developments (totally agree)                          | 17/58 (29)           | 38/231 (17)             | 0.026                     |
| When a new technological product comes on the market, I can't wait to try it (totally agree)                | 12/58 (21)           | 25/230 (11)             | 0.046                     |
| New technologies are causing more problems than they are solving (totally disagree)                         | 24/58 (41)           | 76/232 (33)             | 0.217                     |
| With all of the developments in technology and computers, I find it difficult to keep up (totally disagree) | 19/58 (33)           | 57/232 (25)             | 0.205                     |
| Ease of going online when needed (very easy)                                                                | 63/70 (90)           | 239/291 (82)            | 0.110                     |
| Mobile phone usage (text, internet, and apps vs other combination)                                          | 62/73 (85)           | 264/321 (82)            | 0.583                     |
| Frequency of seeking sex partners online (never)                                                            | 19/66 (29)           | 115/279 (41)            | 0.062                     |
| Current use of online dating sites/apps                                                                     | 27/68 (40)           | 151/281 (54)            | 0.038                     |
| Empowerment - agree or strongly agree that:                                                                 |                      |                         |                           |
| Testing is one way I can take charge of my sexual health                                                    | 67/68 (99)           | 265/286 (93)            | 0.071                     |
| I choose to test for an STI or HIV regardless of what other people think                                    | 60/68 (88)           | 262/286 (92)            | 0.383                     |
| Frequency of testing:                                                                                       |                      |                         |                           |
| More than once per year                                                                                     | 35/68 (52)           | 98/258 (38)             | 0.043                     |
| Once per year to every few years                                                                            | 21/68 (31)           | 77/258 (30)             |                           |
| No set pattern                                                                                              | 12/68 (18)           | 83/258 (32)             |                           |
| First time testing                                                                                          | 4/73 (6)             | 44/305 (14)             | 0.039                     |
| Reason for test:                                                                                            |                      |                         |                           |
| Regularly test & routine test                                                                               | 48/72 (67)           | 125/321 (39)            | <b>&lt;0.0001</b>         |
| New relationship                                                                                            | 17/72 (24)           | 95/321 (30)             | 0.309                     |
| Tested after event or exposure                                                                              | 21/72 (29)           | 91/321 (28)             | 0.890                     |
| Recommended by friends/family/partner                                                                       | 6/72 (8)             | 38/321 (12)             | 0.394                     |
| Recommended by physician                                                                                    | 2/72 (3)             | 4/321 (1)               | 0.338                     |
| Symptoms or contact to STI                                                                                  | 8/72 (11)            | 99/321 (31)             | <b>0.001</b>              |

## b. Interaction with testing providers

| Factor                                                                                                         | GCO clients<br>n (%) | Clinic<br>clients<br>n (%) | p -<br>value <sup>a</sup> |
|----------------------------------------------------------------------------------------------------------------|----------------------|----------------------------|---------------------------|
| Delayed testing in past year due to privacy concern                                                            | 5/71 (7)             | 7/294 (2)                  | 0.048                     |
| Importance of anonymous/confidential testing<br>(very important or important)                                  | 21/72 (29)           | 77/305 (25)                | 0.495                     |
| Comfort discussing sexual history with any health care provider<br>(HCP) (very uncomfortable or uncomfortable) | 13/70 (19)           | 15/290 (5)                 | <0.0001                   |
| Comfort discussing sexual history where usually go for health<br>care<br>(very uncomfortable or uncomfortable) | 27/70 (39)           | 57/258 (22)                | 0.005                     |
| Fear of judgment from HCP when providing sexual history<br>(very worried or worried)                           | 21/70 (30)           | 42/289 (15)                | 0.002                     |
| Usually go to family physician for care when get sick                                                          | 37/70 (53)           | 110/288 (38)               | 0.025                     |

## c. Clinic level

| Factor                                                   | GCO clients<br>n (%) | Clinic<br>clients<br>n (%) | p -<br>value <sup>a</sup> |
|----------------------------------------------------------|----------------------|----------------------------|---------------------------|
| Delaying testing in past year due to access issues       | 40/71 (56)           | 133/294 (45)               | 0.093                     |
| Delaying testing in past year due to distance to clinic  | 20/71 (28)           | 26/294 (9)                 | <0.0001                   |
| Last time tested at clinic: agreed/strongly agreed that: |                      |                            |                           |
| I found the clinic hours to be convenient                | 41/70 (59)           | 221/286 (77)               | 0.001                     |
| I felt uncomfortable in the waiting room                 | 14/70 (20)           | 51/286 (18)                | 0.674                     |
| I found it easy to make an appointment                   | 33/67 (49)           | 189/285 (66)               | 0.009                     |
| I had to wait a long time to see a doctor or nurse       | 35/70 (50)           | 48/286 (17)                | <0.0001                   |
| I felt comfortable using my real name to test            | 50/68 (74)           | 242/285 (85)               | 0.026                     |

## d. Social and structural level

| Factor                                               | GCO clients<br>n (%) | Clinic<br>clients<br>n (%) | p -<br>value <sup>a</sup> |
|------------------------------------------------------|----------------------|----------------------------|---------------------------|
| Age (median; range)                                  | 35 (19-59)           | 30 (19-75)                 | 0.001                     |
| Gender (male or man vs female or woman) <sup>c</sup> | 44/67 (66)           | 141/291 (49)               | 0.011                     |
| Sexual orientation (straight/heterosexual vs other)  | 34/69 (49)           | 197/286 (69)               | 0.002                     |
| Gay, bisexual or other man who has sex with men      | 31/69 (45)           | 48/295 (16)                | <0.0001                   |
| Ethnicity (multiple responses possible):             |                      |                            |                           |
| Indigenous (vs other)                                | 1/71 (1)             | 6/294 (2)                  | 1.00                      |
| White (vs other)                                     | 55/71 (78)           | 228/294 (78)               | 0.988                     |
| Asian <sup>d</sup> (vs other)                        | 12/71 (17)           | 47/294 (16)                | 0.851                     |
| Education:                                           |                      |                            |                           |
| High school or less (vs other)                       | 2/69 (3)             | 24/290 (8)                 | 0.193                     |
| Completed university or higher (vs other)            | 43/69 (62)           | 188/290 (65)               | 0.696                     |
| Full-time employment                                 | 41/71 (58)           | 182/293 (62)               | 0.498                     |
| Income                                               |                      |                            |                           |
| < \$20,000                                           | 13/64 (20)           | 67/284 (24)                | 0.129                     |
| \$20,000-39,000                                      | 10/64 (16)           | 81/284 (29)                |                           |
| \$40,000-59,000                                      | 15/64 (23)           | 60/284 (21)                |                           |

| Factor                                                                      | GCO clients<br>n (%) | Clinic<br>clients<br>n (%) | <i>p</i> -<br>value <sup>a</sup> |
|-----------------------------------------------------------------------------|----------------------|----------------------------|----------------------------------|
| \$60,000-\$69,000                                                           | 13/64 (20)           | 39/284 (14)                |                                  |
| >= \$80,000                                                                 | 13/64 (20)           | 37/284 (13)                |                                  |
| Unstable housing in past year <sup>c</sup>                                  | 2/70 (3)             | 22/293 (8)                 | 0.191                            |
| Living in same city as one year ago                                         | 64/70 (91)           | 227/291 (78)               | 0.011                            |
| Born in Canada                                                              | 55/71 (78)           | 199/292 (68)               | 0.125                            |
| Language spoken at home:                                                    |                      |                            |                                  |
| English                                                                     | 62/70 (89)           | 229/290 (79)               | 0.032                            |
| English and another language                                                | 2/70 (3)             | 41/290 (14)                |                                  |
| Language other than English                                                 | 6/70 (9)             | 20/290 (7)                 |                                  |
| Stigma: Strongly agree or agree that:                                       |                      |                            |                                  |
| It is very embarrassing for me to test for an STI or HIV                    | 11/68 (16)           | 18/286 (6)                 | <b>0.008</b>                     |
| I would feel ashamed if someone I knew found out I tested for an STI or HIV | 13/67 (19)           | 40/286 (14)                | 0.264                            |
| I would feel guilty if I were diagnosed with an STI or HIV                  | 41/68 (60)           | 169/285 (59)               | 0.881                            |
| Social norms: Strongly agree or agree that:                                 |                      |                            |                                  |
| Among my peers, people regularly get tested for an STI or HIV               | 40/68 (59)           | 122/286 (43)               | 0.016                            |

**Legend:**

<sup>a</sup>Due to multiple comparisons, level of significance was set at  $p < 0.01$ ; significant results shown in bold font.

<sup>b</sup>eHEALS scale (Norman C, Skinner HA. eHEALS: The eHealth Literacy Scale, JMIR 2006; 8(4):e27).

<sup>c</sup>Six other gender identities excluded due to small numbers.

<sup>d</sup>Asian, South Asian, Filipino, Southeast Asian, Japanese, Korean.

<sup>e</sup>Couch-surfing, live in hotel, live in shelter, live on street.
